# Supplementary material for: Laboratory-scale bioaugmentation relieves acetate accumulation and stimulates methane production in stalled anaerobic digesters
Source: PubMed Central journal article supplement (PMC4703610; doi:10.1007/s00253-015-7058-3), 2015-10-19
Supplement: 253_2015_7058_MOESM1_ESM.pdf [file 253_2015_7058_MOESM1_ESM.pdf]

Journal: Applied Microbiology and Biotechnology

**Laboratory scale bioaugmentation relieves acetate accumulation and stimulates methane production in stalled anaerobic digesters**

Jennifer R. Town<sup>ab</sup> and Tim J. Dumonceaux<sup>ab#</sup>

Agriculture and Agri-Food Canada, 107 Science Pl., Saskatoon, Saskatchewan, Canada<sup>a</sup>;

Department of Veterinary Microbiology, WCVM, University of Saskatchewan, Saskatoon, Saskatchewan, Canada<sup>b</sup>

#Corresponding author. Phone +1-306-385-9450; fax +1-306-385-9482; email

[tim.dumonceaux@agr.gc.ca](mailto:tim.dumonceaux@agr.gc.ca).

**Supplemental material**

**Supplemental Table S1** The total (TS) and volatile (VS) solids composition of reactor input material

|               | <b>%TS</b> | <b>%VS (of TS)</b> |
|---------------|------------|--------------------|
| Inoculum      | 12.1       | 76.5               |
| Thin Stillage | 12.0       | 90.4               |
| Input         | 5.02       | 81.1               |

**Supplemental Table S2** OTU-specific qPCR primer sequences and amplification conditions

| <b>Target</b> | <b>Primer Sequence (5'-3')</b> | <b>Amplification conditions</b>                                | <b>Reference</b>                          |
|---------------|--------------------------------|----------------------------------------------------------------|-------------------------------------------|
| OTU795        | CCTAAGCGTTCCCATAGAA            | 95°C 5 min (1x)                                                | Town et al.                               |
|               | TTGCCTCTTCCTGGTCTA             | 95°C 15 sec; 55°C 20 sec; 72°C 20 sec (40x)<br>72°C 2 min (1x) | Bioresour. Technol.<br>151:249-257, 2014. |
| OTU805        | AGATCGCCATCGACATCA             | 95°C 5 min (1x)                                                | Town et al.                               |
|               | CTCGGTGAGCTTCTCCTT             | 95°C 15 sec; 57°C 20 sec; 72°C 20 sec (40x)<br>72°C 2 min (1x) | Bioresour. Technol.<br>151:249-257, 2014  |
| OTU2923       | CCGTCCTGAACGAGCCCTA            | 95°C 5 min (1x)                                                | This study                                |
|               | GCTGCACGACCTTCTCCA             | 95°C 15 sec; 57°C 20 sec; 72°C 20 sec (40x)<br>72°C 2 min (1x) |                                           |
| OTU1109       | GTCTAACACCATCGGCACTAC          | 95°C 5 min (1x)                                                | This study                                |
|               | CGCTCGCTGTCGGTAATC             | 95°C 15 sec; 57°C 20 sec; 72°C 20 sec (40x)<br>72°C 2 min (1x) |                                           |
